# Supplementary material for: An efficient process for the Cu(0)-mediated synthesis and subsequent chain extension of poly(methyl acrylate) macroinitiator
Source: Royal Society of Chemistry journal article supplement (doi:10.1039/c9re00224c), 2019-01-01
Supplement: c9re00224c1.pdf [file c9re00224c1.pdf]

Supporting Information

## An efficient process for the Cu(0)-mediated synthesis and subsequent chain extension of poly(methyl acrylate) macroinitiator

Niloofer Shirali Zadeh, Morgan J. Cooze, Nathaniel R. Barr, and Robin A. Hutchinson\*

Department of Chemical Engineering, Queen's University, Kingston ON K7L 3N6, Canada

### A. Conversion Calculation based on NMR

NMR spectra of poly(ethylene glycol) methyl ether acrylate ( $M_n=480 \text{ g}\cdot\text{mol}^{-1}$ )

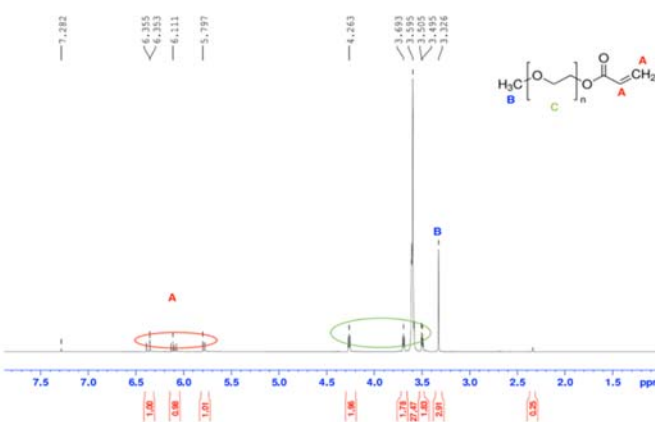

Final conversion of poly(MA)<sub>10</sub> in DMSO batch system

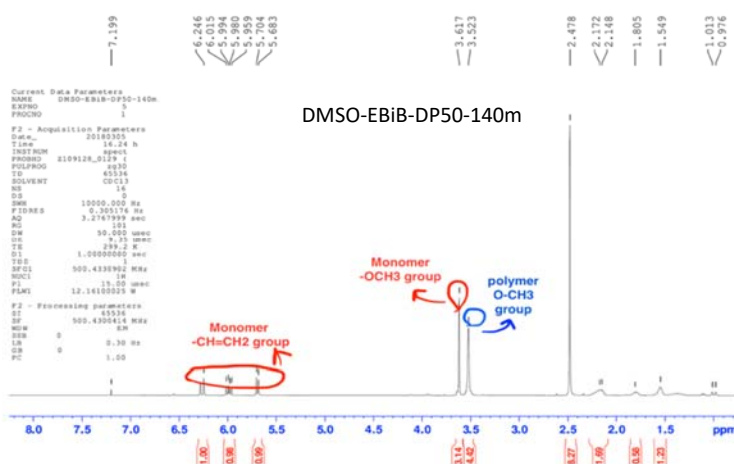

Method #1:

$$\text{conversion} = \frac{\text{polymer O-CH}_3 \text{ group integral}}{\text{polymer O-CH}_3 \text{ group integral} + \text{monomer O-CH}_3 \text{ group integral}} \times 100 = \frac{4.42}{4.42 + 3.14} \times 100 \approx 58\%$$

Method #2:

$$\begin{aligned} \text{conversion} &= \frac{\text{polymer } O - CH_3 \text{ group integral}}{\text{polymer } O - CH_3 \text{ integration} + \text{sum of monomer } - CH = CH_2 \text{ integration}} \times 100 \\ &= \frac{4.42}{4.42 + (1 + 0.98 + 0.99)} \times 100 \approx 59\% \end{aligned}$$

### Conversion of poly(MA<sub>10</sub>-*block*-BA)<sub>90</sub> in PGME solvent

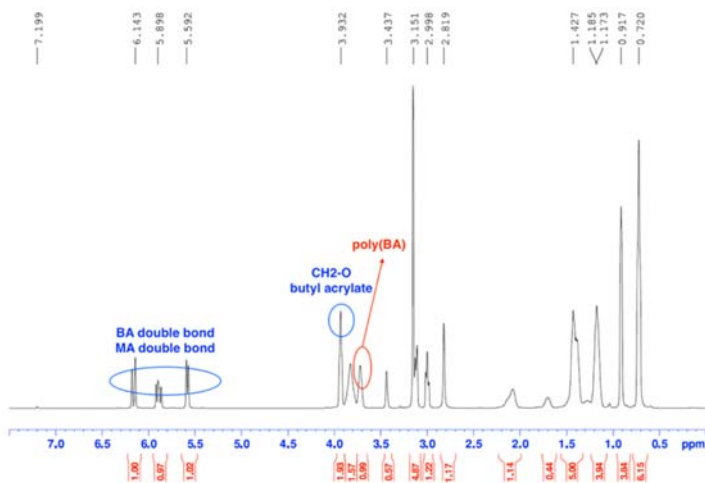

$$\text{conversion} = \frac{\text{polymer integral}}{\text{polymer integral} + \text{monomer } O - CH_2 \text{ integral}} \times 100 = \frac{0.99}{0.99 + 1.93} \times 100 \approx 34\%$$

Because BA and MA double bonds peaks are overlapping, second method of conversion calculation cannot be used.

### Conversion of poly(MA<sub>10</sub>-*block*-PEGMEA<sub>50</sub>-*block*-MA<sub>50</sub>) in PGME semi-batch system

Because the O-CH<sub>3</sub> groups in MA monomer and poly(MA) are overlapping with PEGMEA repeating unit the conversion cannot be calculated by NMR spectra.

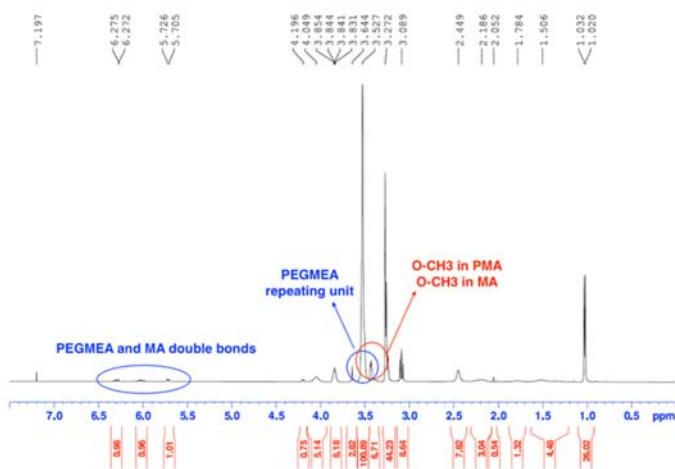

Conversion of poly(MA<sub>10</sub>-block-PEGMEA<sub>100</sub>) in PGME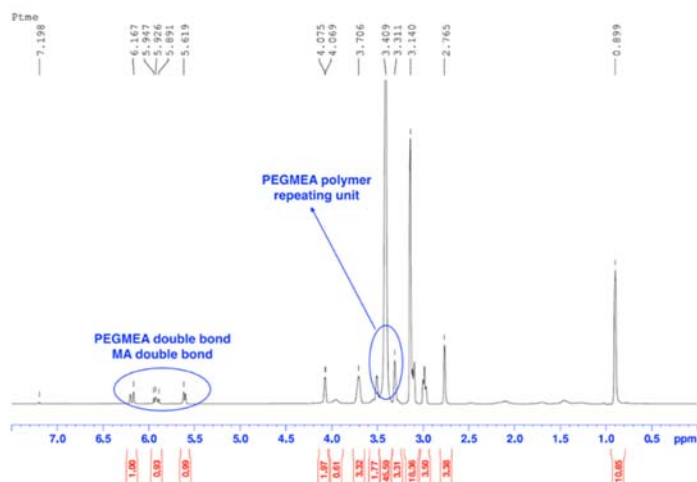

$$\frac{1}{CA} = \frac{1}{CA_0} (1 - \text{Conv.}) \rightarrow \frac{1}{\text{chain extended Polymer integral}} = \frac{1}{\text{macroinitiator integral (Section A appendix)}} (1 - \text{conv.})$$

$$\text{conv.} = \left(1 - \frac{27.47}{45.59}\right) \times 100 \approx 39\%$$

Although PEGMEA repeating unit and O-CH<sub>3</sub> group in P(MA) and MA monomer are overlapping, the conversion was calculated by assuming MA monomer and polymer integration (DP10) negligible compared to PEGMEA groups (DP100) at 3.3-3.6 ppm. Thus, the peak in 3.4 ppm was considered as the PEGMEA repeat unit.

Conversion of poly(PEGMEA)<sub>10</sub> in PGME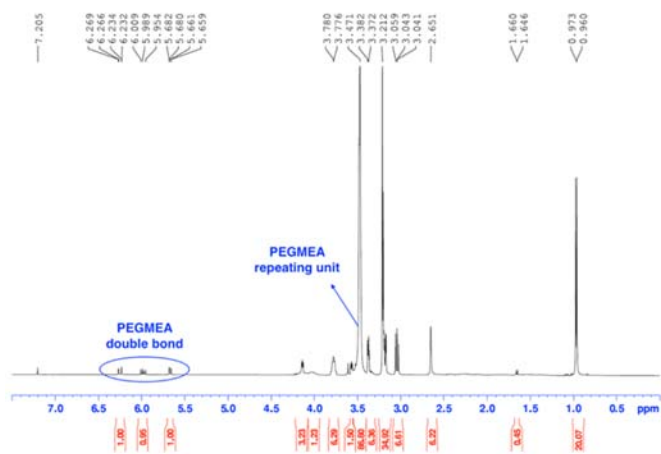

$$\frac{1}{CA} = \frac{1}{CA_0} (1 - \text{Conv.}) \rightarrow \frac{1}{\text{chain extended Polymer integral}} = \frac{1}{\text{macroinitiator integral (Spectra on page 84)}} (1 - \text{conv.})$$

$$\text{conv.} = \left(1 - \frac{27.47}{86.80}\right) \times 100 \approx 68\%$$

**Conversion of poly(PEGMEA<sub>10</sub>-*block*-MA)<sub>50</sub> in PGME solvent**

Because the O-CH<sub>3</sub> groups in MA monomer and poly(MA) overlap with PEGMEA repeat units the conversion cannot be calculated by using just the final NMR spectra. Assuming that in chain extension reaction MA was the only polymer that grow, the conversion can be calculated by subtracting the integral of PEGMEA repeating group in macroinitiator spectra from integral of overlapped area in chain extended spectra:

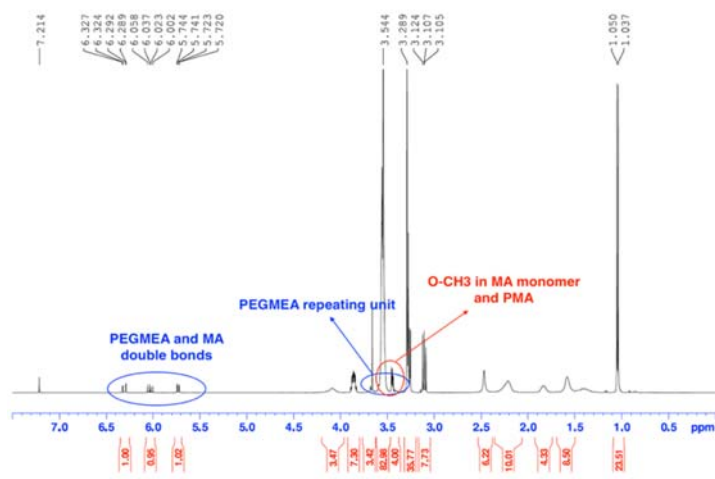

$$\text{conv.} = \frac{82.98 - 60.19}{(82.98 - 60.19) + 3(O - CH_3 \text{ in MA monomer})} \approx 88$$

NMR spectra of poly(PEGMEA)<sub>10</sub> macroinitiator produced in the copper tube

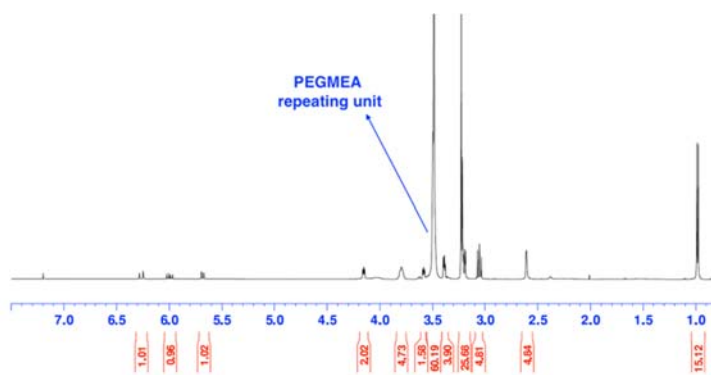**B. Polymerizations and Chain Extensions in Batch Mode.**

**Experimental** : Experiments were done in batch mode to explore the influence of solvent and initiator choice as well as reagent ratios on methyl acrylate polymerization rate and control; in all cases, reactions were conducted at ambient temperature, solvent level was 30 wt%, and 2 g of copper wire wrapped around the stirrer bar was used as the catalyst. EBiB and MBP were used as initiators, DMSO, methanol, PGME and isopropanol were explored as solvents, and target chain length was varied from 10 to 100 by controlling the amount of alkyl halide initiator added, with the amount of Me<sub>6</sub>TREN ligand used adjusted to keep the level at 1 mol% relative to initiator. As an example with [MA]<sub>0</sub>:[initiator]<sub>0</sub>: [Me<sub>6</sub>TREN]<sub>0</sub> = 10:1:0.01 (target DP=10), MA (35.0 g, 0.407 mol), Me<sub>6</sub>TREN (0.096 g, 0.407 mmol) and solvent (18.8 g) were added to a 100 mL round-bottomed flask containing a stirrer bar wrapped with Cu wire. The system (generally at room temperature in an oil bath, with a few experiments conducted at 50 °C) was purged with N<sub>2</sub> for 30 min, at which point MBP (6.79 g, 40.7 mmol) or EBiB (8.09 g, 40.7 mmol) initiator was injected to the system with a syringe. This action was considered as the start of reaction. Samples (0.1 mL) were withdrawn via syringe at 20 min intervals and added to deuterated chloroform for determination of MA conversion by NMR, shaking well to stop the reaction by exposure to air. The reaction was stopped after 2 h, also by exposure to air. The stirrer bar/Cu wire was removed, with the solution saved without purification for chain extension studies. Samples were analyzed by NMR and, in some cases, by size exclusion

chromatography (SEC), using procedures described in the paper. Results obtained are summarized in Table S1, with discussion presented in the manuscript. Good control ( $\mathcal{D} < 1.15$ ) was maintained as target chain length was reduced from 100 to 10, with the resulting MMDs shown as Fig. S1(a), and selected conversion profiles shown as Fig. S1(b).

**Table S1** Conversions and molar masses (number average and dispersity) of poly(methyl acrylate) formed by Cu(0)-catalyzed batch polymerization after 140 min. Experiments conducted in 30 wt% solvent using EBiB or MBP as initiator and Me<sub>6</sub>TREN as ligand for different target chain lengths with initial reactant molar ratios  $[MA]_0:[Initiator]_0:[lig]_0$  set to Target DP:1:0.01, unless otherwise noted.

| EXP. | Solvent                  | Initiator | Target DP | Temp (°C) | Conversion | $M_n$ (g·mol <sup>-1</sup> ) | $\mathcal{D}$ |
|------|--------------------------|-----------|-----------|-----------|------------|------------------------------|---------------|
| D1   | DMSO                     | MBP       | 100       | 25        | 82%        | 8075                         | 1.17          |
| D2   | DMSO                     | EBiB      | 100       | 25        | 81%        | 7263                         | 1.13          |
| D3   | DMSO                     | EBiB      | 50        | 25        | 72%        | 3504                         | 1.11          |
| D4   | DMSO                     | EBiB      | 20        | 25        | 76%        | 1705                         | 1.12          |
| D5   | DMSO                     | EBiB      | 10        | 25        | 81%        | 873                          | 1.12          |
| M1   | Methanol                 | MBP       | 100       | 25        | 69%        | 6207                         | 1.10          |
| M2   | Methanol                 | EBiB      | 100       | 25        | 36%        | 3076                         | 1.12          |
| M3   | Methanol                 | EBiB      | 50        | 25        | 31%        | 1736                         | 1.09          |
| M4   | Methanol                 | EBiB      | 20        | 25        | 22%        | -                            | -             |
| M5   | Methanol                 | EBiB      | 10        | 25        | 29%        | -                            | -             |
| M6   | Methanol <sup>a</sup>    | EBiB      | 10        | 25        | 75%        | 892                          | 1.09          |
| M7   | Methanol                 | EBiB      | 10        | 40        | 20%        | -                            | -             |
| I1   | Isopropanol              | EBiB      | 10        | 25        | 80%        | 877                          | 1.14          |
| I2   | Isopropanol <sup>a</sup> | EBiB      | 10        | 25        | 96%        | 1128                         | 1.09          |
| P1   | PGME                     | EBiB      | 100       | 25        | 81%        | 5909                         | 1.40          |
| P2   | PGME <sup>a</sup>        | EBiB      | 100       | 25        | 97%        | 1066                         | 1.11          |
| P3   | PGME                     | EBiB      | 10        | 25        | 91%        | 976                          | 1.10          |
| P4   | PGME                     | EBiB      | 10        | 60        | 71%        | 757                          | 1.12          |

<sup>a</sup>  $[MA]_0:[EBiB]_0:[Me_6TREN]_0$  set to Target DP:1:0.05

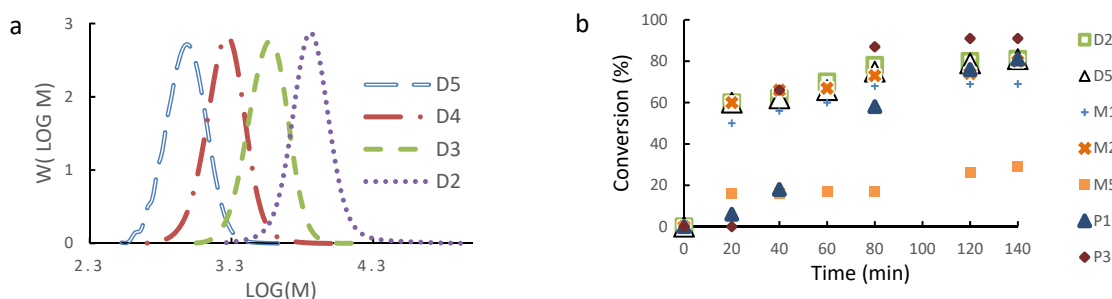

Fig. S1 (a) MMDs of poly(MA) produced in DMSO by batch polymerization over Cu wire at room temperature. (b) Evolution of monomer conversion vs. time for batch methyl acrylate polymerizations in different solvents with various target chains. Experimental details are summarized in Table S1.

Batch chain extensions were conducted at room temperature using poly(MA) macroinitiator solution produced in batch without purification, with additional MA added to increase final target chain length to 100, assuming full conversion. Additional solvent was also added to keep the level at 30 wt%. A series of experiments were performed to determine the amount of reducing agent (Asc) and additional Me<sub>6</sub>TREN ligand required for effective chain extension. As an example, 5 g of macroinitiator solution made in batch was added with MA (31.0 g, 0.36 mol) and solvent (10.0 g) to a 100 mL flask and purged with N<sub>2</sub> for 1h; no additional Cu was added to the system. After purging, Me<sub>6</sub>TREN (0.011 g, 0.04 mmol) and ascorbic acid (7.0 mg, 0.04 mmol) dissolved in 3 g of solvent were injected with separate syringes to the flask to

start the reaction. The reaction proceeded for 2 h, with samples collected every 20 min. Dispersities remained low as the poly(MA) chains grew from length 10 to 100, and there is no evidence of tailing in the resulting MMDs (Fig. S2). It should be noted that, while the initial macroinitiator (with DP10) solution had a greenish hue, the solution was colorless after chain extension in the presence of Asc. It is also noted that excellent chain extension was achieved using a macroinitiator batch (B0-3) that SEC analysis indicated had a high-MW tail. This last set of batch chain extensions demonstrates the feasibility of storing the macroinitiator solution for an extended period before its use.

**Table S2** Batch chain extension of poly(MA) macroinitiator solutions to a target DP of 100 in 30 wt% solvent at room temperature by addition of Me<sub>6</sub>TREN ligand and/or ascorbic acid (Asc). CE indicates the chain extended polymers synthesized using the macroinitiator solution B<sub>0</sub> made by batch polymerization using EBIB initiator, with CE molar ratios of components specified relative to macroinitiator chains added.

| EXP.             | Solvent | Storage Time | [MA] <sub>0</sub> : [EBiB] <sub>0</sub> : [lig] <sub>0</sub> : [Asc] <sub>0</sub> | Time (min) | Conversion | M <sub>n</sub> (g·mol <sup>-1</sup> ) | Đ    |
|------------------|---------|--------------|-----------------------------------------------------------------------------------|------------|------------|---------------------------------------|------|
| B <sub>0-1</sub> | DMSO    | -            | 10:1:0.01:0                                                                       | 140        | 91%        | 980                                   | 1.11 |
| CE1              | DMSO    | -            | 90:0:0.01:0                                                                       | 120        | 69%        | 6945                                  | 1.05 |
| CE2              | DMSO    | -            | 90:0:0:0.01                                                                       | 120        | 78%        | 7243                                  | 1.09 |
| CE3              | DMSO    | -            | 90:0:0.01:0.01                                                                    | 120        | 84%        | 7245                                  | 1.10 |
| CE4              | DMSO    | 1 day        | 90:0:0:0.01                                                                       | 120        | 83%        | 7979                                  | 1.09 |
| CE5              | DMSO    | 1 day        | 90:0:0.01:0                                                                       | 120        | 72%        | 6616                                  | 1.05 |
| CE6              | DMSO    | 1 day        | 90:0:0.01:0.01                                                                    | 120        | 91%        | 9041                                  | 1.07 |
| B <sub>0-2</sub> | PGME    | -            | 10:1:0.01:0                                                                       | 140        | 91%        | 907                                   | 1.11 |
| CE7              | PGME    | 1 day        | 90:0:0:0.01                                                                       | 120        | 15%        | -                                     | -    |
| CE8              | PGME    | 1 day        | 90:0:0:0.02                                                                       | 120        | 15%        | -                                     | -    |
| CE9              | PGME    | 1 day        | 90:0:0.01:0                                                                       | 120        | 22%        | -                                     | -    |
| CE10             | PGME    | 1 day        | 90:0:0.01:0.01                                                                    | 120        | 38%        | 3655                                  | 1.12 |
| CE11             | PGME    | -            | 90:0:0.02:0.01                                                                    | 120        | 37%        | -                                     | -    |
| CE12             | PGME    | -            | 90:0:0.01:0.02                                                                    | 120        | 51%        | 5310                                  | 1.09 |
| CE13             | PGME    | 1 day        | 90:0:0.01:0.04                                                                    | 120        | 72%        | 7592                                  | 1.09 |
| CE14             | PGME    | 2 days       | 90:0:0.01:0.06                                                                    | 120        | 84%        | 8129                                  | 1.29 |
| CE15             | PGME    | 2 days       | 90:0:0.01:0.07                                                                    | 120        | 78%        | 6072                                  | 1.16 |
| B <sub>0-3</sub> | PGME    | -            | 10:1:0.01:0                                                                       | 140        | 75%        | 741                                   | 1.87 |
| CE16             | PGME    | 7 days       | 90:0:0.01:0.06                                                                    | 120        | 91%        | 9348                                  | 1.15 |
| CE17             | PGME    | 10 days      | 90:0:0.01:0.06                                                                    | 120        | 53%        | 4049                                  | 1.14 |

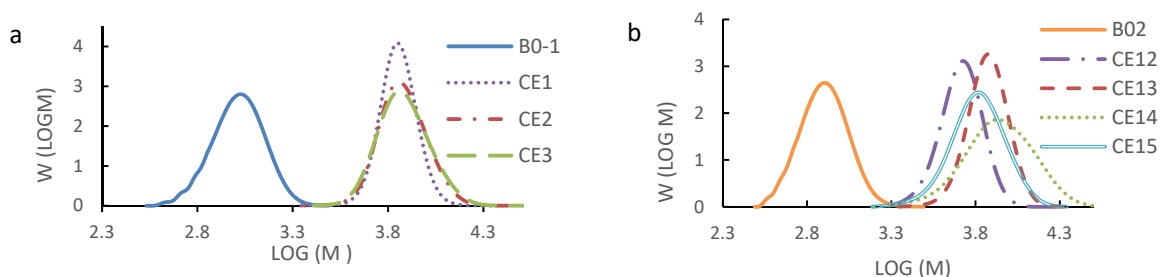

Fig. S2 MMDs of poly(MA) macroinitiator (B0-1; B0-2) after batch chain extension to target DP of 100 in DMSO (CE1-3) and PGME (CE12-CE15); experimental details are summarized in Table S2.
